# Supplementary material for: Irregular Cycles, Ovulatory Disorders, and Cardiometabolic Conditions in a US-Based Digital Cohort
Source: PubMed Central journal article supplement — JAMA Netw Open. 2024 May 3;7(5):e249657. doi: 10.1001/jamanetworkopen.2024.9657 (PMC11069087; doi:10.1001/jamanetworkopen.2024.9657), 2024-05-03
Supplement: jamanetwopen-e249657-s002.pdf [file jamanetwopen-e249657-s002.pdf]

## Data Sharing Statement

Wang. Irregular Cycles, Ovulatory Disorders, and Cardiometabolic Conditions in a US-Based Digital Cohort. *JAMA Netw Open*. Published May 03, 2024.

doi:10.1001/jamanetworkopen.2024.9657

### Data

**Data available:** No

### Additional Information

**Explanation for why data not available:** Aggregated data that support the findings of this study may be available upon reasonable request from the corresponding author & senior author. Any request for data will be evaluated and responded to in a manner consistent with policies intended to protect participant confidentiality and language in the Study protocol and informed consent form.
